# Supplementary material
Source: publisher figshare collection journal article supplement (https://sage.figshare.com/ndownloader/files/13158542)
Supplement: Supplementary file 1 [file 13158542]

### Supplementary

**Figure 1** This diagram showed the partway of patients with suspected TB first visit at OPD until received correct diagnosis.

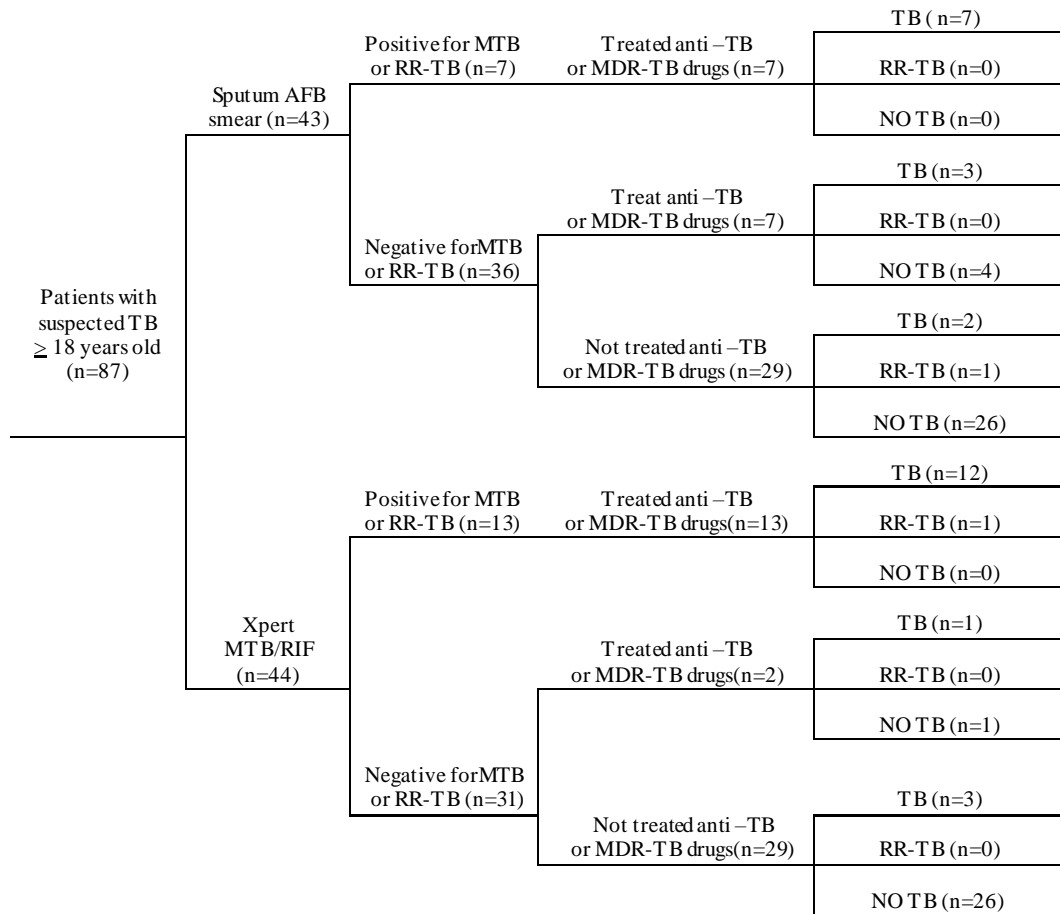

**Table 1** The number of tests per patient for comparing the Xpert MTB/RIF with the sputum culture (n=87).

| Method               | Culture positive | Culture negative | Total |
|----------------------|------------------|------------------|-------|
| <b>Xpert MTB/RIF</b> |                  |                  |       |
| Positive             | 24               | 0                | 24    |
| Negative             | 5                | 58               | 63    |
| Total                | 29               | 58               | 87    |

**Table 2** The number of tests per patient for comparing the sputum AFB smear with the sputum culture method (n=87).

| Method                  | Culture positive | Culture negative | Total |
|-------------------------|------------------|------------------|-------|
| <b>Sputum AFB smear</b> |                  |                  |       |
| Positive                | 14               | 0                | 14    |
| Negative                | 15               | 58               | 73    |
| Total                   | 29               | 58               | 87    |

**Table 3** Value of diagnostic tests between the Xpert MTB/RIF and the sputum AFB smear when compare with the sputum culture method. (n=87)

| Value       | Xpert MTB/RIF | 95% CI       | Sputum AFB smear | 95% CI       |
|-------------|---------------|--------------|------------------|--------------|
| Sensitivity | 82.76         | 64.23-94.15  | 48.28            | 29.45- 67.47 |
| Specificity | 100.0         | 93.84-100.0  | 100.0            | 93.84- 100.0 |
| PPV         | 100.0         | -            | 100.0            | -            |
| NPV         | 92.06         | 83.94-96.26  | 79.45            | 73.12-84.61  |
| Accuracy    | 94.25         | 87.10- 98.11 | 82.76            | 73.16-90.02  |
| Prevalence  | 33.33         | 23.58- 44.25 | 33.33            | 23.58-44.25  |

**Table 4** Comparison of the proportion of diagnosis between the Xpert MTB/RIF and the sputum AFB smear group (n=87).

| Variable                                                                                | Xpert MTB/RIF n (%) | Sputum AFB smear n(%) | Total n | Proportion differences (95%CI) |
|-----------------------------------------------------------------------------------------|---------------------|-----------------------|---------|--------------------------------|
| 1) Patients with true positive for MTB and were treated with anti-TB drugs.             | 12 (30.0)           | 7 (19.4)              | 19      | 0.263 (-0.004, 0.569)          |
| 2) Patients with true positive for MTB with RR-TB and were treated with MDR drugs.      | 1 (2.5)             | 0                     | 1       | NA                             |
| 3) Patients with false negative for MTB and were with treated anti-TB drugs.            | 1 (2.5)             | 3 (8.3)               | 4       | -0.500 (-1.00, -0.100)*        |
| 4) Patients with true negative for MTB and were not treated.                            | 26 (65.0)           | 26 (72.3)             | 52      | 0.000 (-0.192, 0.192)          |
| 5) Patients with false negative for MTB and were not treated with anti-TB drugs.        | 3 (75.0)            | 1(16.6)               | 4       | -0.500 ( -0.100, 1.100)        |
| 6) Patients with true negative for MTB but were treated with anti-TB drugs.             | 1(25.0)             | 4(66.8)               | 5       | -0.600( -1.096, -0.104)*       |
| 7) Patients with false negative for MTB with RR-TB and were not treated with MDR drugs. | 0                   | 1(16.6)               | 1       | NA                             |

\* Statistically significant at  $p < 0.05$ .
